# Supplementary material
Source: publisher site journal article supplement (https://www.dovepress.com/get_supplementary_file.php?f=354219.docx)
Supplement: Supplementary file 1 [file get_supplementary_file.php]

Figure Supplementary 1

The top 10 genes in the module are most relevant to the traits of the TDM group. The gene Pclaf marked with yellow acted as a key DEGs between TDM group and the other 2 control groups.

| Gene name | Forward primers | Reverse primers |
| --- | --- | --- |
| *Pclaf* | TGCTTGGCTCCTCCACCTTTGT | CCGATGCCTTTTTGCCACTTGG |
| *Wnt5a* | GGAACGAATCCACGCTAAGGGT | AGCACGTCTTGAGGCTACAGGA |
| *Wnt5b* | GCTACCGCTTTGCCAAGGAGTT | CATTTGCAGGCGACATCAGCCA |
| *Fzd1* | GTGCTCACGTACCTAGTGGACA | TCCTCCAACAGAAAGCCAGCGA |
| *Fzd2* | CGCTTCCACTTTCTTCACGGTC | GGAGAACGAAGCCCGCAATGTA |
| *Ctnnb1* | GTTCGCCTTCATTATGGACTGCC | ATAGCACCCTGTTCCCGCAAAG |
| *Lef1* | ACTGTCAGGCGACACTTCCATG | GTGCTCCTGTTTGACCTGAGGT |
| *Ccnd1* | GCAGAAGGAGATTGTGCCATCC | AGGAAGCGGTCCAGGTAGTTCA |
| *Shh* | GGATGAGGAAAACACGGGAGCA | TCATCCCAGCCCTCGGTCACT |
| *Hhip* | CAACCAGGAACGGTGGGCTATT | TCTGCGACTTCCAGAAACACCC |
| *Gli1* | CTCAAACTGCCCAGCTTAACCC | TGCGGCTGACTGTGTAAGCAGA |
| *Gli2* | ACACTGTGGAGGACTGCCTACA | GGCATCTCCATGCCACTGTCAT |
| *Ptch1* | CCTCGCTTACAAACTCCTGGTG | TGATGCCATCTGCGTCTACCAG |
| *Ptch2* | GGCACTCACATCCGTCAACAAC | GAAGACGAGCATTACCGCTGCA |
| *Gapdh* | CATCACTGCCACCCAGAAGACTG | ATGCCAGTGAGCTTCCCGTTCAG |

**Table S1 Primers for qPCR experiments**
